# Supplementary material for: Ni-based Semiconductors From Ldh-precursors Synthetized Using Amines
Source: Preprints.org preprint supplement (doi:10.20944/preprints202407.2236.v1), 2024-07-29
Supplement: Supplementary file 1 [file supplementary]

Support Information

**Ni-BASED SEMICONDUCTORS FROM LDH-PRECURSORS SYNTHETIZED USING AMINES**

Alexander Misol1,2, Alejandro Jiménez1, Patricia Benito3,4, Francisco M. Labajos1*, Vicente Rives1

1 GIR-QUESCAT, Departamento de Química Inorgánica, Universidad de Salamanca, 37008, Salamanca, Spain; alex_aspa6@usal.es, alejm@usal.es; [labajos@usal.es](mailto:labajos@usal.es); [vrives@usal.es](mailto:vrives@usal.es)

2 Instituto de Ciencia de Materiales de Madrid (ICMM), CSIC, Madrid 28049, Spain

3 Dipartimento Chimica Industriale “Toso Montanari”, Università di Bologna, Viale Risorgimento 4, 40136, Bologna, Italy; patricia.benito3@unibo.it

4 Center for Chemical Catalysis – C3, Alma Mater Studiorum – Università di Bologna, Viale Risorgimento 4, 40136, Bologna, Italy.

***** Correspondence: [labajos@usal.es](mailto:labajos@usal.es)

**Figure S1.** DRS of LDHs calcined at 600 ºC.

**Figure S2.** Linear fitting of the direct band gaps plots.
